# Supplementary material for: Photosensing and Characterizing of the Pristine and In-, Sn-Doped Bi2Se3 Nanoplatelets Fabricated by Thermal V–S Process
Source: MDPI journal article supplement (doi:10.3390/nano11051352), 2021-05-20
Supplement: s1 [file s1]

## Supplementary Materials

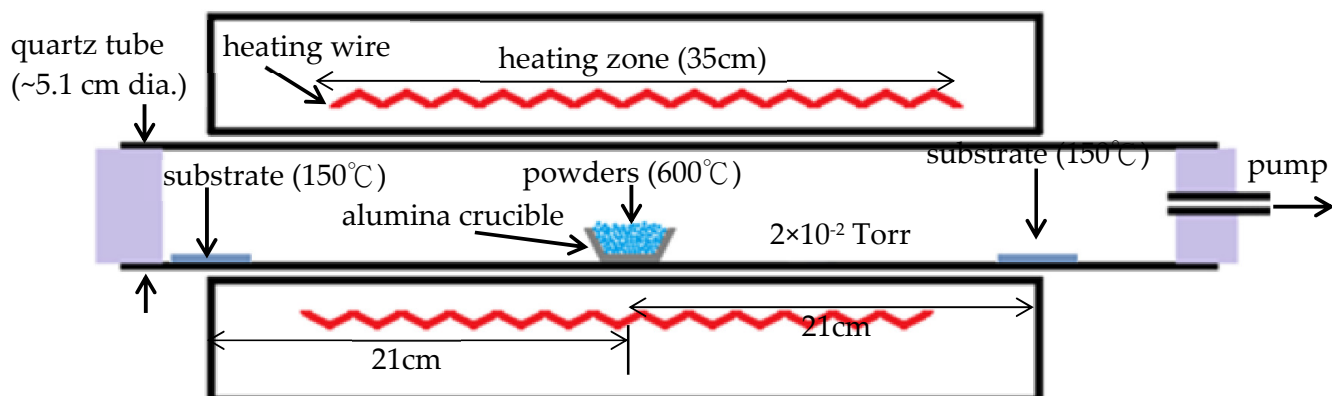

Figure S1. Schematic of the furnace, crucible, substrate and operating conditions.

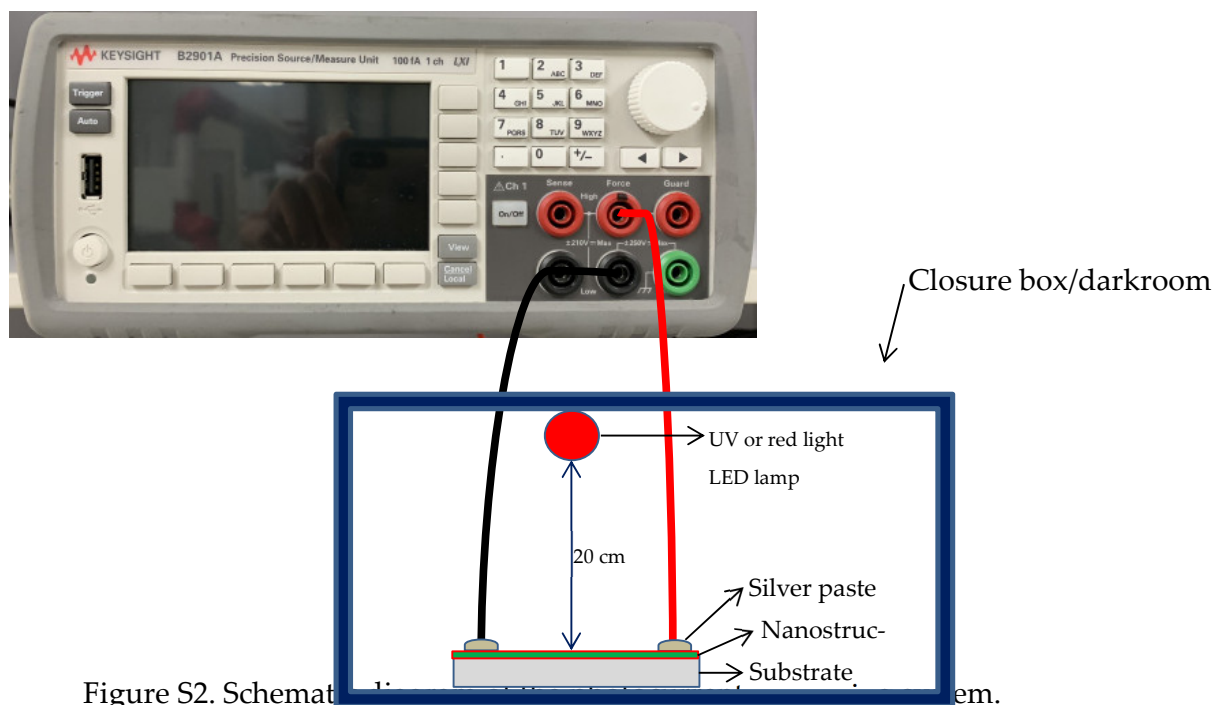

Figure S2. Schematic of the measurement setup.

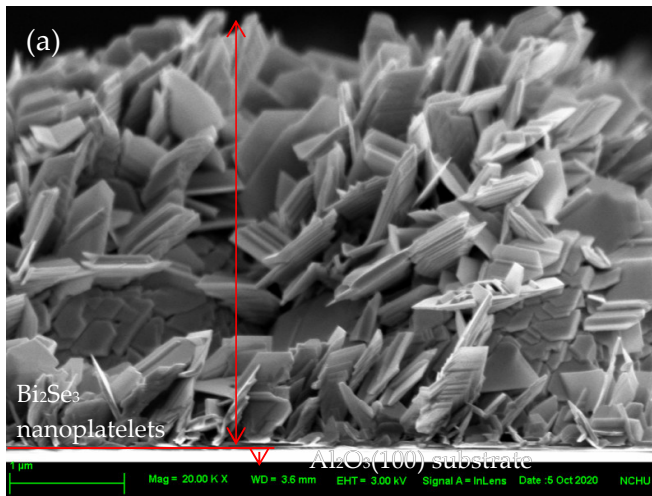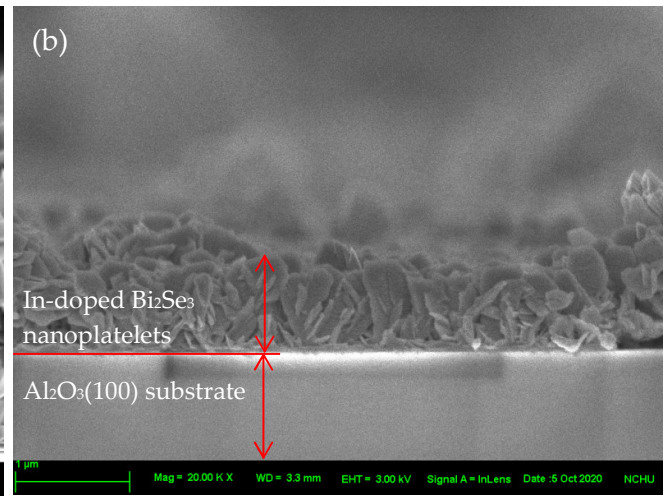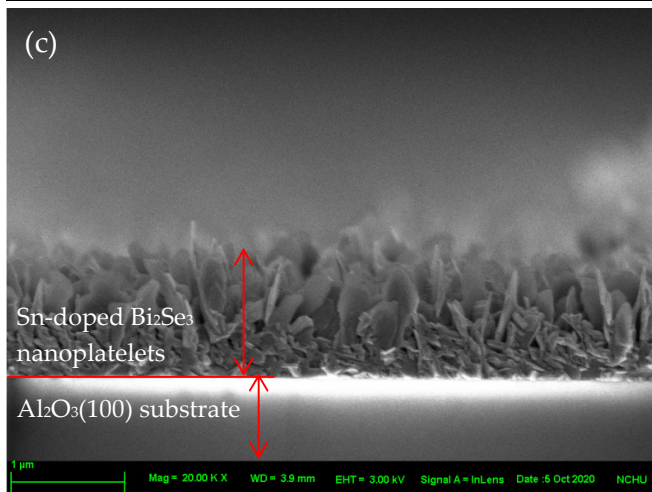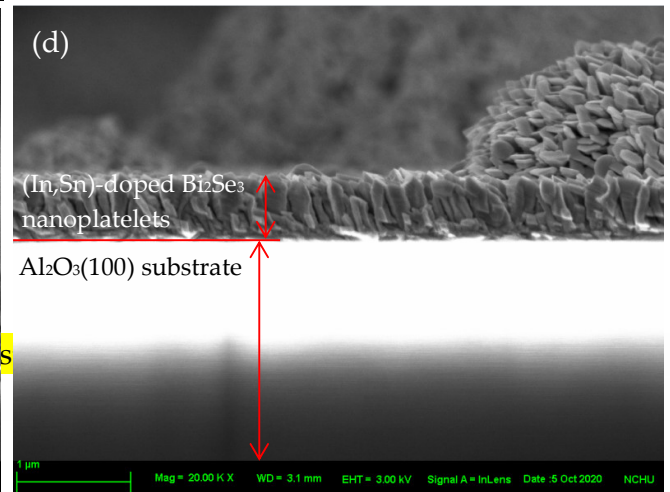

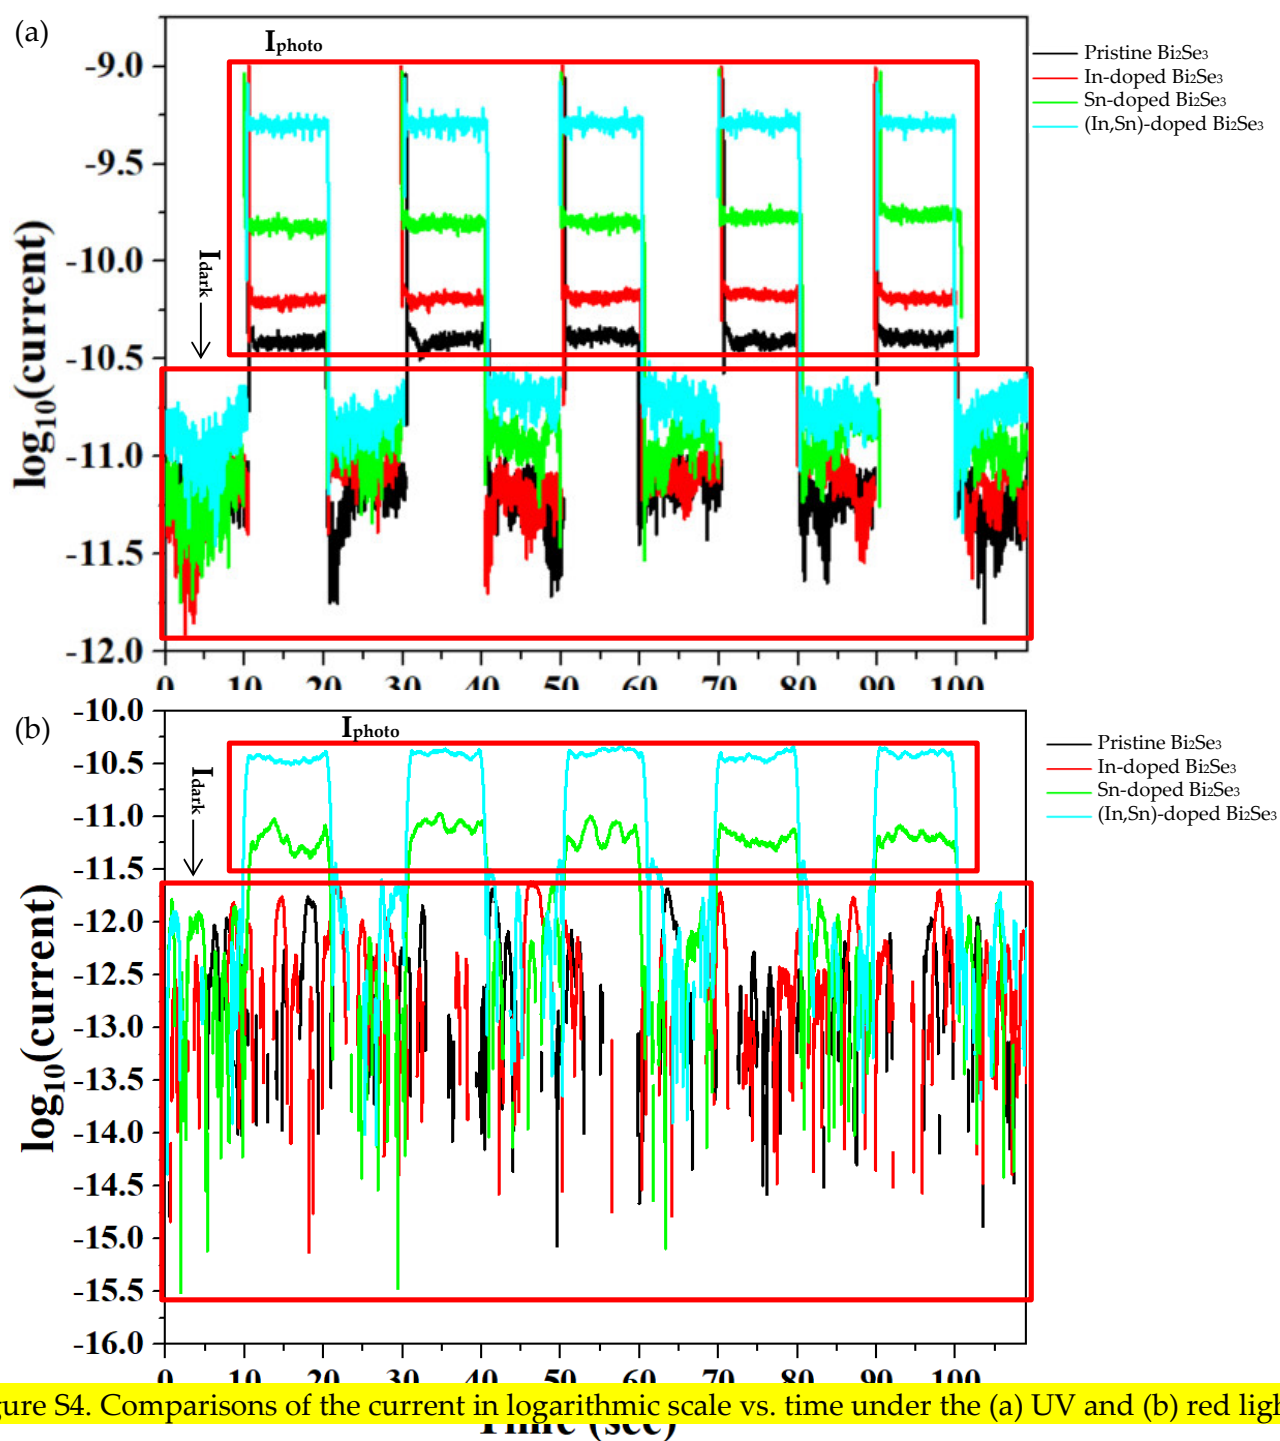

Figure S4. Comparisons of the current in logarithmic scale vs. time under the (a) UV and (b) red light.

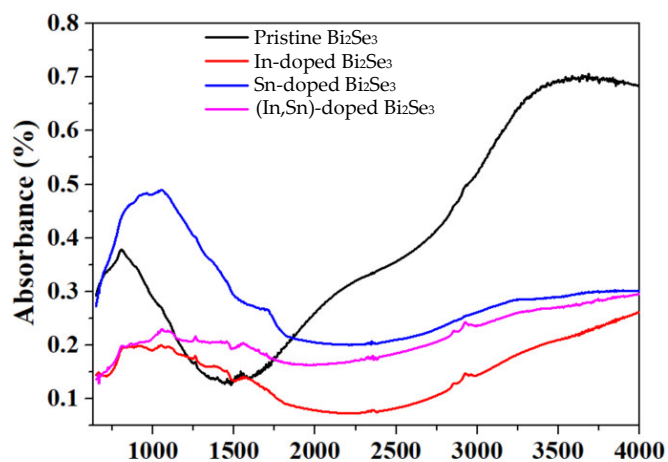

Figure S5. FPA-FTIR absorbance and (b) estimated optical band gaps of the pristine, and In-, Sn-, and (In,Sn)-doped Bi<sub>2</sub>Se<sub>3</sub> nanoplalelets.

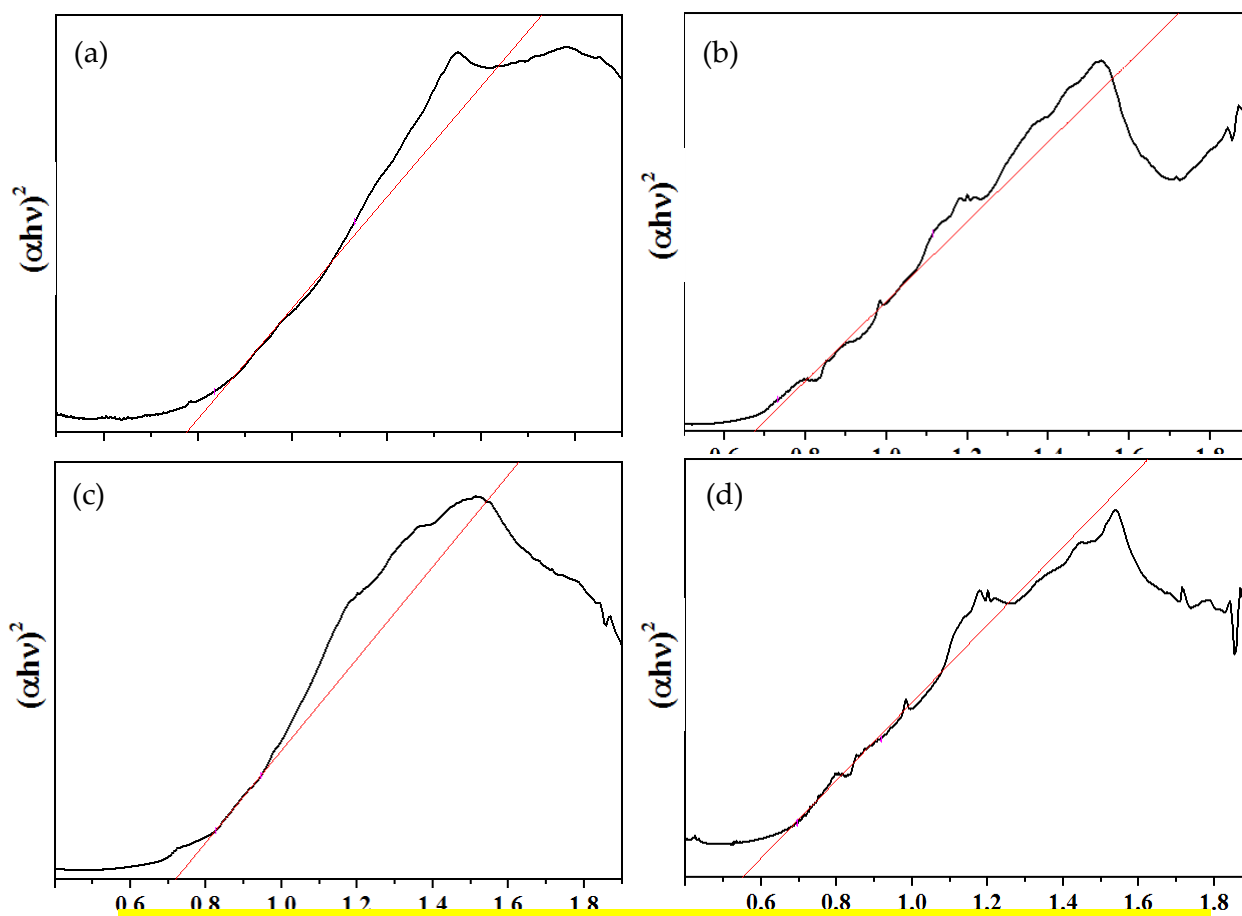

Figure S6. The estimated optical band gaps of (a) pristine, and (b) In-, (c) Sn-, and (d) (In,Sn)-doped Bi<sub>2</sub>Se<sub>3</sub> nanoplalelets.

Table S1. Lists of the Bi<sub>2</sub>Se<sub>3</sub>-based photodetectors.

| Materials                                                                                                                           | Substrate                            | Incident light wavelength (nm); power (mW/cm <sup>2</sup> ) | Incident light type      | Reference |
|-------------------------------------------------------------------------------------------------------------------------------------|--------------------------------------|-------------------------------------------------------------|--------------------------|-----------|
| Bi <sub>2</sub> Se <sub>3</sub> /MoO <sub>3</sub> thin films                                                                        | Mica                                 | 405–1550; 8.49                                              | Laser                    | [1]       |
| Bi <sub>2</sub> Se <sub>3</sub> nanowires/nanobelts                                                                                 | Glass                                | 460, 568, 595, 660, 1500; 0.25                              | LED                      | [2]       |
| Bi <sub>2</sub> Se <sub>3</sub> nanowires                                                                                           | Si(111)                              | 785                                                         | Diode laser              | [3]       |
| SnTe/Bi <sub>2</sub> Se <sub>3</sub> thin films                                                                                     | SiO <sub>2</sub> /Si                 | 1550; 0.16–9.33                                             | Laser                    | [4]       |
| Bi <sub>2</sub> Se <sub>3</sub> nanowires                                                                                           | Si wafer                             | 325, 442, 632, 808, 1060; 0–112.16                          | He-Cd laser/ micro laser | [5]       |
| Bi <sub>2</sub> Se <sub>3</sub> flakes                                                                                              | n/a                                  | 2.5×10 <sup>5</sup> (0.12THz); 0.525                        | Laser                    | [6]       |
| Bi <sub>2</sub> Se <sub>3</sub> -FA <sub>0.85</sub> Cs <sub>0.15</sub> PbI <sub>3</sub> -Bi <sub>2</sub> Se <sub>3</sub> thin films | Sapphire (0006)                      | 365, 405, 520, 650, 808, 980; 0.0053–63.7                   | Diode laser              | [7]       |
| Bi <sub>2</sub> Se <sub>3</sub> nanoflakes/Si nanowires                                                                             | B-doped p-type Si (111)              | 890; 1–12.3                                                 | Xe lamp                  | [8]       |
| Graphene/ Bi <sub>2</sub> Se <sub>3</sub> thin films                                                                                | Sapphire                             | 3500; 0.05                                                  | Laser                    | [9]       |
| Bi <sub>2</sub> Se <sub>3</sub> nanowires/SiO <sub>2</sub>                                                                          | n-type Si wafer                      | 808; 1.8–179.2                                              | Laser diode              | [10]      |
| Bi <sub>2</sub> Se <sub>3</sub> thin films/ SiO <sub>2</sub>                                                                        | n-type Si wafer                      | 808; n/a<br>960; n/a<br>1310; 50–540<br>1550; 50–950        | Laser                    | [11]      |
| Bi <sub>2</sub> Se <sub>3</sub> nanowires/ SiO <sub>2</sub>                                                                         | Si wafer                             | 532; 32, 1064; 29                                           | Laser                    | [12]      |
| Bi <sub>2</sub> Se <sub>3</sub> nanoplatelets                                                                                       | Al <sub>2</sub> O <sub>3</sub> (100) | 365;8W, 700-900;5W                                          | LED lamp                 | This work |

Table S2. Lists of the Bi<sub>2</sub>Se<sub>3</sub> doped with various elements and the variation of the band gap energy.

| Bi <sub>2</sub> Se <sub>3</sub> bulk band gap (eV) | Dopant | Doped Bi <sub>2</sub> Se <sub>3</sub> Band gap (eV) | Reference |
|----------------------------------------------------|--------|-----------------------------------------------------|-----------|
| 0.67                                               | Te     | 0.7–0.78                                            | [13]      |
| 0.30                                               |        | 0.06–0.20                                           | [14]      |
| 1.73                                               | Sb     | 1.80–1.94                                           | [15]      |
| n/a                                                | Mn     | n/a                                                 | [16]      |
| 0.114                                              | Pb     | 0.105–0.127                                         | [17]      |
| 0.32                                               | Dy     | 0.42, 0.83                                          | [18]      |
| 0.99                                               | Ni     | 0.32                                                | [19]      |
| 2.01                                               |        | 1.65                                                | [20]      |
| 0.3                                                | Sn     | n/a                                                 | [21]      |
| 0.973                                              |        | 0.717                                               | This work |
| 0.32                                               | Cr     | 0.01–0.28                                           | [22]      |
| 0.32                                               |        | 0.01                                                | [23]      |
| n/a                                                | C      | n/a                                                 | [24]      |
| n/a                                                | S      | n/a                                                 | [25]      |
| n/a                                                | Eu     | n/a                                                 | [26]      |
| n/a                                                | Cu     | n/a                                                 | [27]      |
| n/a                                                | Ca     | n/a                                                 | [28]      |
| n/a                                                | Nb     | n/a                                                 | [29]      |
| n/a                                                | In     | n/a                                                 | [30]      |
| 0.973                                              |        | 0.641                                               | This work |
| 0.3                                                | V      | n/a                                                 | [31]      |
| 0.2–0.3                                            | Gd     | 0.03                                                | [32]      |
| 0.3                                                | Tl     | 0.158                                               | [33]      |
| 0.32                                               | Fe     | 0.028                                               | [22]      |
| 0.32                                               |        | 0.028–0.18                                          | [21]      |

|       |                         |           |           |
|-------|-------------------------|-----------|-----------|
| 2.95  | Nd                      | 2.57–2.88 | [34]      |
| 0.973 | Co-dopant<br>of (In,Sn) | 0.548     | This work |

## References

1. Yang, M.; Han, Q.; Liu, X.; Han, J.; Zhao, Y.; He, L.; Gou, J.; Wu, Z.; Wang, X.; Wang, J. Ultra-high stability 3D TI Bi<sub>2</sub>Se<sub>3</sub>/MoO<sub>3</sub> thin film heterojunction infrared photodetector at optical communication waveband. *Adv. Funct. Mater.* **2020**, *30*, 1909659.
2. Salvato, M.; Scagliotti, M.; De Crescenzi, M.; Castrucci, P.; De Matteis, F.; Crivellari, M.; Cresi, S. P.; Catone, D.; Bauch, T.; F. Lombardi, Stoichiometric Bi<sub>2</sub>Se<sub>3</sub> topological insulator ultra-thin films obtained through a new fabrication process for optoelectronic applications. *Nanoscale* **2020**, *12*, 12405.
3. Meyer, N.; Geishendorf, K.; Walowski, J.; Thomas, A.; Münzenberg, M. Photocurrent measurements in topological insulator nanowires. *Appl. Phys. Lett.* **2020**, *116*, 172402.
4. Zhang, H.; Song, Z.; Li, D.; Xu, Y.; Li, J.; Bai, C.; Man, B. Near-infrared photodetection based on topological insulator P-N heterojunction of SnTe/Bi<sub>2</sub>Se<sub>3</sub>. *Appl. Surf. Sci.* **2020**, *509*, 145290.
5. Wang, X.; Dai, G.; Liu, B.; Zou, H.; Chen, Y.; Mo, X.; Li, X.; Sun, J.; Liu, Y.; Liu, Y.; Yang, J. Broadband photodetectors based on topological insulator Bi<sub>2</sub>Se<sub>3</sub> nanowire with enhanced performance by strain modulation effect. *Physica E: Low-dimensional Systems and Nanostructures* **2019**, *114*, 113620.
6. Tang, W.; Politano, A.; Guo, C.; Guo, W.; Liu, C.; Wang, L.; Chen, X.; Lu, W. Ultrasensitive Room-Temperature Terahertz Direct Detection Based on a Bismuth Selenide Topological Insulator. *Adv. Funct. Mater.* **2018**, *28*, 1801786.
7. Liang, F. X.; Liang, L.; Zhao, X. Y.; Luo, L. B.; Liu, Y. H.; Tong, X. W.; Zhang, Z. X.; Huang, J. C. A sensitive broadband (UV–vis–NIR) perovskite photodetector using topological insulator as electrodes. *Adv. Optical Mater.* **2019**, *7*, 1801392.
8. Das, B.; Das, N. S.; Sarkar, S.; Chatterjee, B. K.; Chattopadhyay, K. K. Topological insulator Bi<sub>2</sub>Se<sub>3</sub>/Si-nanowire-based p-n junction diode for high-performance near-infrared photodetector. *ACS Appl. Mater. Interfaces* **2017**, *9*, 22788–22798.
9. Kim, J.; Park, S.; Jang, H.; Koirala, N.; Lee, J. B.; Kim, U. J.; Lee, H. S.; Roh, Y. G.; Lee, H.; Sim, S.; Cha, S.; In, C.; Park, J.; Lee, J.; Noh, M.; Moon, J.; Salehi, M.; Sung, J.; Chee, S. S.; Ham, M. H.; Jo, M. H.; Oh, S.; Ahn, J. H.; Hwang, S. W.; Kim, D.; Choi, H. Highly Sensitive, Gate-Tunable, Room-Temperature Mid-Infrared Photodetection Based on Graphene-Bi<sub>2</sub>Se<sub>3</sub> Heterostructure. *ACS Photonics* **2017**, *4*, 482–488.
10. Liu, C.; Zhang, H.; Sun, Z.; Ding, K.; Mao, J.; Shao, Z.; Jie, J. Topological insulator Bi<sub>2</sub>Se<sub>3</sub> nanowire/Si heterostructure photodetectors with ultrahigh responsivity and broadband response. *J. Mater. Chem. C* **2016**, *4*, 5648–5655.
11. Zhang, H.; Zhang, X.; Liu, C.; Lee, S. T.; Jie, J. High-Responsivity, High-detectivity, ultrafast topological insulator Bi<sub>2</sub>Se<sub>3</sub>/silicon heterostructure broadband photodetectors. *ACS Nano* **2016**, *10*, 5113–5122.
12. Sharma, A.; Bhattacharyya, B.; Srivastava, A. K.; Senguttuvan, T. D.; Husale, S. High performance broadband photodetector using fabricated nanowires of bismuth selenide. *Sci.*

- Rep.* **2016**, *6*, 19138.
13. Augustine, S.; Ampili, S.; Kang, J. K.; Mathai, E. Structural, electrical and optical properties of  $\text{Bi}_2\text{Se}_3$  and  $\text{Bi}_2\text{Se}_{(3-x)}\text{Te}_x$  thin films. *Mater. Res. Bull.* **2005**, *40*, 1314–1325.
  14. Adam, A. M.; Elshafaie, A.; Mohamed, A. E. A.; Petkov, P.; Ibrahim, E. M. M. Thermoelectric properties of Te doped bulk  $\text{Bi}_2\text{Se}_3$  system. *Mater. Res. Express* **2018**, *5*, 035514.
  15. Patil, N. S.; Sargar, A. M.; Mane, S. R.; Bhosale, P. N. Growth mechanism and characterisation of chemically grown Sb doped  $\text{Bi}_2\text{Se}_3$  thin films. *Appl. Surf. Sci.* **2008**, *254*, 5261–5265.
  16. Sánchez-Barriga, J.; Varykhalov, A.; Springholz, G.; Steiner, H.; Kirchschrager, R.; Bauer, G.; Caha, O.; Schierle, E.; Weschke, E.; Ünal, A. A.; Valencia, S.; Dunst, M.; Braun, J.; Ebert, H.; Minár, J.; Golias, E.; Yashina, L.V.; Ney, A.; Holy, V.; Rader, O. Nonmagnetic band gap at the Dirac point of the magnetic topological insulator  $(\text{Bi}_{1-x}\text{Mn}_x)_2\text{Se}_3$ , *Nat. Commun.* **2016**, *7*, 10559.
  17. Karamazov, S.; Horák, J.; Navrátil, J.; Lošták, P. Characterisation of  $\text{Bi}_2\text{Se}_3$  crystals highly doped with Pb. *Cryst. Res. Technol.* **1997**, *32*, 249–260.
  18. Gupta, A.; Srivastava, S. K. Paramagnetism, hopping conduction, and weak localization in highly disordered pure and Dy-doped  $\text{Bi}_2\text{Se}_3$  nanoplates. *J. Appl. Phys.* **2020**, *127*, 244302.
  19. Mohyedin, M. Z.; Malik, N. A.; Taib, M. F. M.; Mustaffa, M.; Hassan, O. H.; Ali, A. M. M.; Haq, B. U.; Yahya, M. Z. A. First principles study of structural, electronic and optical properties of orthorhombic phase Ni-doped  $\text{Bi}_2\text{Se}_3$  using density functional theory. *Comput. Condens. Matter* **2020**, *25*, e00510.
  20. Mazumder, K.; Sharma, A.; Kumar, Y.; Shirage, P. M. Temperature dependent I-V characteristics of Ni doped topological insulator  $\text{Bi}_2\text{Se}_3$  nanoparticles. *AIP Conference Proceedings* **2019**, *2115*, 030147.
  21. Stephen, G. M.; Naumov, I.; Tyagi, S.; Vail, O. A.; DeMell, J. E.; Dreyer, M.; Butera, R. E.; Hanbicki, A. T.; Taylor, P. J.; Mayergoyz, I.; Dev, P.; Friedman, A. L. Effect of Sn doping on surface states of  $\text{Bi}_2\text{Se}_3$  thin films. *J. Phys. Chem. C* **2020**, *124*, 27082–27088.
  22. Zhang, J. M.; Zhu, W.; Zhang, Y.; Xiao, D.; Yao, Y. Tailoring magnetic doping in the topological insulator  $\text{Bi}_2\text{Se}_3$ . *Phys. Rev. Lett.* **2012**, *109*, 266405.
  23. Zhang, J. M.; Ming, W.; Huang, Z.; Liu, G. B.; Kou, X.; Fan, Y.; Wang, K. L.; Yao, Y. Stability, electronic, and magnetic properties of the magnetically doped topological insulators  $\text{Bi}_2\text{Se}_3$ ,  $\text{Bi}_2\text{Te}_3$ , and  $\text{Sb}_2\text{Te}_3$ . *Phys. Rev. B* **2013**, *88*, 235131.
  24. Xin, X.; Guo, C.; Pang, R.; Zhang, M.; Shi, X.; Yang, X.; Zhao, Y. Theoretical and experimental studies of spin polarized carbon doped  $\text{Bi}_2\text{Se}_3$ . *Appl. Phys. Lett.* **2019**, *115*, 042401.
  25. Jin, W.; Wang, Z. Sulfur-doped  $\text{Bi}_2\text{Se}_3$  monolayer as potential electrode materials for Mg-ion batteries. *IOP Conf. Ser.: Mater. Sci. Eng.* **2019**, *677*, 022125.
  26. Sultana, R.; Gurjar, G.; Gahtori, B.; Patnaik, S.; Awana, V. P. S. Structural, surface morphology and magneto-transport properties of self flux grown Eu doped  $\text{Bi}_2\text{Se}_3$  single crystal. *Mater. Res. Express* **2019**, *6*, 096107.
  27. Li, M.; Wang, Z.; Yang, L.; Gao, X. P. A.; Zhang, Z. From linear magnetoresistance to parabolic magnetoresistance in Cu and Cr-doped topological insulator  $\text{Bi}_2\text{Se}_3$  films. *J. Phys. Chem. Solids* **2019**, *128*, 331–336.
  28. Zhang, M.; Liu, L. G.; Wang, D.; An, X. Y.; Yang, H. Enhancement of surface state contribution

- in cadmium doped  $\text{Bi}_2\text{Se}_3$  single crystal. *J. Alloys Compd.* **2019**, *806*, 180–186.
29. Kurter, C.; Finck, A. D. K.; Huemiller, E. D.; Medvedeva, J.; Weis, A.; Atkinson, J. M.; Qiu, Y.; Shen, L.; Lee, S. H.; Vojta, T.; Ghaemi, P.; Hor, Y. S.; Van Harlingen, D. J. Conductance spectroscopy of exfoliated thin flakes of  $\text{Nb}_x\text{Bi}_2\text{Se}_3$ . *Nano Lett.* **2019**, *19*, 38–45.
30. Kimura, K.; Hayashi, K.; Yashina, L. V.; Happo, N.; Nishioka, T.; Yamamoto, Y.; Ebisu, Y.; Ozaki, T.; Hosokawa, S.; Matsushita, T.; Tajiri, H. Local structural analysis of In-doped  $\text{Bi}_2\text{Se}_3$  topological insulator using X-ray fluorescence holography. *Surf. Interface Anal.* **2019**, *51*, 51–55.
31. Zhang, L.; Zhao, D.; Zang, Y.; Yuan, Y.; Jiang, G.; Liao, M.; Zhang, D.; He, K.; Ma, X.; Xue, Q. Ferromagnetism in vanadium-doped  $\text{Bi}_2\text{Se}_3$  topological insulator films. *APL Mater.* **2017**, *5*, 076106.
32. Zheng, F.; Zhang, Q.; Meng, Q.; Wang, B.; Fan, L.; Zhu, L.; Song, F.; Wang, G. Electronic structures and magnetic properties of rare-earth (Sm, Gd) doped  $\text{Bi}_2\text{Se}_3$ . *Chalcogenide Lett.* **2017**, *14*, 551–560.
33. Saeed, Y.; Singh, N.; Schwingenschlögl, U. Enhanced thermoelectric figure of merit in strained  $\text{Ti}$ -doped  $\text{Bi}_2\text{Se}_3$ . *Appl. Phys. Lett.* **2014**, *105*, 031915.
34. Alemi, A.; Babalou, A.; Dolatyari, M.; Klein, A.; Meyer, G. Hydrothermal synthesis of  $\text{Nd}^{\text{III}}$  doped  $\text{Bi}_2\text{Se}_3$  nanoflowers and their physical properties. *Z. Anorg. Allg. Chem.* **2009**, *635*, 2053–2057.
